# Supplementary material for: Prognostic Value of Right Ventricular Free-Wall Longitudinal Strain Compared to Conventional Echocardiographic Parameters in Tricuspid Regurgitation: A Systematic Review and Meta-Analysis
Source: Research Square preprint supplement (doi:10.21203/rs.3.rs-5443708/v1), 2024-12-17
Supplement: Supplementary file 1 [file 4794a6fe78076f0bc429fdbd.docx]

**Table S2: Reasons for full-text exclusion**

| First Author | Year | Reason for exclusion |
| --- | --- | --- |
| Prihadi | 2019 | Duplicated population with other study |
| Fortuni | 2021 | Duplicated population with other study |
| Schneider | 2021 | Not including HR of RVfwLS as a continuous variable, only binary variable |
| Brener | 2022 | Not including HR of RVfwLS as a continuous variable, only binary variable |
| Kim | 2022 | Not including HR of RVfwLS, only HR of RVGLS |
| Sugiura | 2022 | Not available value of HR for RVfwLS |
| Utsunomiya | 2022 | Not available value of HR for RVfwLS |
| Ancona | 2023 | Duplicated population with other study |
| Gavazzoni | 2023 | Duplicated population with other study |
| Hanses | 2023 | Not available value of HR for RVfwLS |
| Hinojar | 2023 | Duplicated population with other study |
| Kane | 2023 | Not available value of HR for RVfwLS |
| Omori | 2023 | Not available value of HR for RVfwLS |
| Samim | 2023 | Not including HR of RVfwLS as a continuous variable, only binary variable |

HR, hazard ratio; RVfwLS, right ventricular free-wall longitudinal strain; RVGLS, right ventricular global longitudinal strain.
