# Supplementary material for: Prognostic Value of Right Ventricular Free-Wall Longitudinal Strain Compared to Conventional Echocardiographic Parameters in Tricuspid Regurgitation: A Systematic Review and Meta-Analysis
Source: Research Square preprint supplement (doi:10.21203/rs.3.rs-5443708/v1), 2024-12-17
Supplement: Supplementary file 2 [file 66b9443fad73e1bad5a7ff65.docx]

**Table S1: Search strategies**

1. **PubMed:**

(("tricuspid valve insufficiency"[MeSH Terms] OR "tricuspid regurgitation"[Text Word]) AND "Echocardiography"[MeSH Terms] AND ("Prognosis"[MeSH Terms] OR "Mortality"[MeSH Terms] OR "outcome"[Text Word])) AND ((humans[Filter]) AND (english[Filter]))

Search date on 04/Feb/2024

Results: 1158 articles

1. **Scopus:**

( ( TITLE-ABS-KEY ( "tricuspid regurgitation" ) ) OR ( TITLE-ABS-KEY ( "tricuspid valve insufficiency" ) ) ) AND ( TITLE-ABS-KEY ( "echocardiography" ) ) AND ( ( TITLE-ABS-KEY ( outcome ) OR TITLE-ABS-KEY ( mortality ) OR TITLE-ABS-KEY ( prognosis ) ) ) AND ( LIMIT-TO ( LANGUAGE , "English" ) ) AND ( LIMIT-TO ( EXACTKEYWORD , "Human" ) )

Search date on 04/Feb/2024

Results: 3129 articles
