# Supplementary material for: Prognostic Value of Right Ventricular Free-Wall Longitudinal Strain Compared to Conventional Echocardiographic Parameters in Tricuspid Regurgitation: A Systematic Review and Meta-Analysis
Source: Research Square preprint supplement (doi:10.21203/rs.3.rs-5443708/v1), 2024-12-17
Supplement: Supplementary file 3 [file 8591a66b56f4c78dda33d25f.docx]

**Table S3: Summary of studies quality analysis**

| First Author | Reporting | | | | External/Internal validity | | | | |
| --- | --- | --- | --- | --- | --- | --- | --- | --- | --- |
|  | (1) | (2) | (3) | (4) | (5) | (6) | (7) | (8) | (9) |
| Kim | Yes | Yes | Yes | Yes | Yes | Yes | Yes | Yes | Yes |
| Wang | Yes | Yes | Yes | Yes | Yes | NR | Yes | Yes | No |
| Dietz | Yes | Yes | Yes | Yes | Yes | NR | Yes | Yes | No |
| Bannehr | Yes | Yes | Yes | Yes | Yes | Yes | Yes | Yes | No |
| Fortuni | Yes | Yes | Yes | Yes | Yes | NR | Yes | Yes | No |
| Anocona | Yes | Yes | Yes | Yes | Yes | NR | Yes | Yes | Yes |
| Gavazzoni | Yes | Yes | Yes | Yes | Yes | Yes | Yes | Yes | No |
| Hinojar | Yes | Yes | Yes | Yes | Yes | Yes | Yes | Yes | Yes |
| Akintoye | Yes | Yes | Yes | Yes | Yes | Yes | Yes | Yes | Yes |
| Ogawa_2023 | Yes | Yes | Yes | Yes | Yes | Yes | Yes | Yes | Yes |
| Ogawa_2024 | Yes | Yes | Yes | Yes | Yes | Yes | Yes | Yes | Yes |

(1), hypothesis/aim/objective described; (2), outcome described; (3), characteristics described; (4), main findings described; (5), representative population; (6), blinded to outcome data; (7), imaging protocol; (8), appropriate statistical analysis; (9), reproducibility analysis performed; NR, not reported.
